# Supplementary material for: Near-infrared-driven Cr(vi) reduction in aqueous solution based on a MoS2/Sb2S3 photocatalyst
Source: Royal Society of Chemistry journal article supplement (doi:10.1039/c7cy02531a), 2018-01-01
Supplement: c7cy02531a1.pdf [file c7cy02531a1.pdf]

**Near-infrared-driven Cr(VI) reduction in aqueous solution based on MoS<sub>2</sub>/Sb<sub>2</sub>S<sub>3</sub>  
photocatalyst**

Xingzhong Yuan <sup>a, b, \*</sup>, Hui Wang <sup>a, b, \*</sup>, Junjie Wang <sup>c</sup>, Guangming Zeng <sup>a, b</sup>, Xiaohong  
Chen <sup>d</sup>, Zhibin Wu <sup>a, b</sup>, Longbo Jiang <sup>a, b</sup>, Ting Xiong <sup>a, b</sup>, Jin Zhang <sup>a, b</sup>, Hou Wang <sup>a, b, e</sup>

\*

*a. College of Environmental Science and Engineering, Hunan University, Changsha  
410082, P.R. China*

*b. Key Laboratory of Environment Biology and Pollution Control, Hunan University,  
Ministry of Education, Changsha 410082, P.R. China*

*c. Key Laboratory of Complex Electromagnetic Environment Effects on Electronics  
and Information system, National University of Defense Technology, Changsha,  
410073, P.R. China*

*d. Hunan University of Commerce, Changsha 410205, PR China*

*e. School of Chemical and Biomedical Engineering, Nanyang Technological  
University, Singapore 637459, Singapore*

---

\* Corresponding author at: College of Environmental Science and Engineering, Hunan University, Changsha 410082, PR China. Tel.: +86 731 88821413; fax: +86 731 88823701. E-mail address: [yxz@hnu.edu.cn](mailto:yxz@hnu.edu.cn) (X.Z. Yuan); [wanghuihui@hnu.edu.cn](mailto:wanghuihui@hnu.edu.cn) (H. Wang); [huankewanghou024@163.com](mailto:huankewanghou024@163.com) (H. Wang)

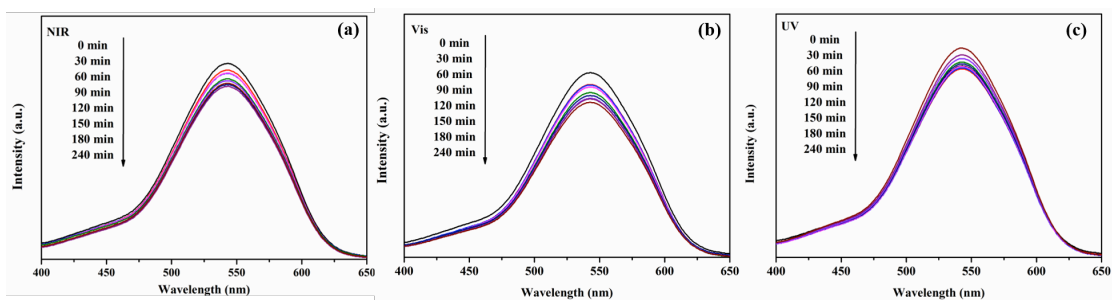

**Fig.S1.** The UV-vis absorption spectra of MS-2 sample for the reduction of Cr (VI) under NIR (a), Vis (b) and UV (c).

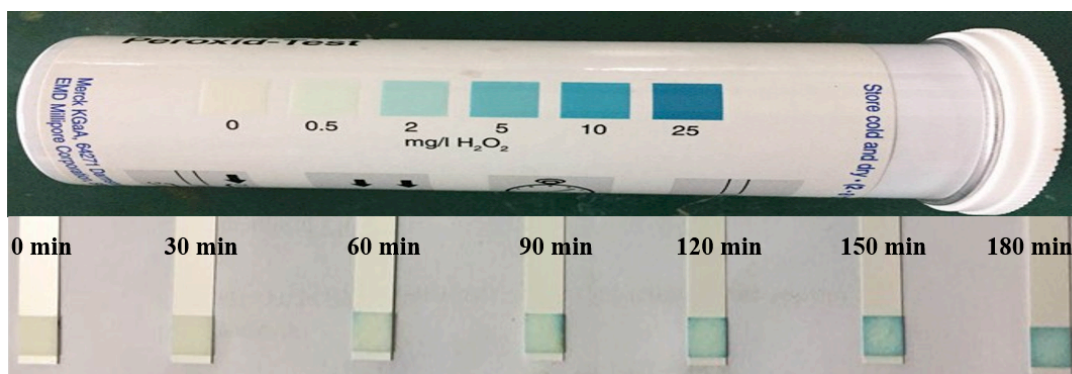

**Fig.S2.** The concentration of intermediate product  $H_2O_2$  detected by the test paper.
